# Supplementary material for: Light induced crosslinking of main chain polybenzoxazines
Source: Royal Society of Chemistry journal article supplement (doi:10.1039/d1py01080h), 2021-01-01
Supplement: d1py01080h1.pdf [file d1py01080h1.pdf]

Supplementary Material for

**Light Induced Crosslinking of Main Chain Polybenzoxazines**

Zeynep Deliballi<sup>1</sup>, Baris Kiskan<sup>1,\*</sup>, Yusuf Yagci<sup>1,2\*</sup>

<sup>1</sup>*Istanbul Technical University, Department of Chemistry, 34469, Maslak, Istanbul, Turkey*

<sup>2</sup>*Faculty of Science, Chemistry Department, King Abdulaziz University, 21589 Jeddah, Saudi Arabia*

\*Corresponding Authors: (B. Kiskan), (Y. Yagci)

e-mail: [kiskanb@itu.edu.tr](mailto:kiskanb@itu.edu.tr)

[yusuf@itu.edu.tr](mailto:yusuf@itu.edu.tr)

**CONTENTS:**

| <b>Title</b>                                                                                                                                                     | <b>Page</b> |
|------------------------------------------------------------------------------------------------------------------------------------------------------------------|-------------|
| <b>Figure S1:</b> GPC trace of MPBz.....                                                                                                                         | 2           |
| <b>Figure S2:</b> <sup>1</sup> H NMR spectrum of MPBz.....                                                                                                       | 2           |
| <b>Figure S3:</b> FTIR spectrum of MPBz.....                                                                                                                     | 3           |
| <b>Figure S4:</b> DSC thermogram of MPBz.....                                                                                                                    | 3           |
| <b>Figure S5:</b> UV-Vis spectrum of MPBz in CH <sub>2</sub> Cl <sub>2</sub> .....                                                                               | 4           |
| <b>Figure S6:</b> DSC thermograms of MPBz/DPI <sub>25%-w/w</sub> mixture (a), MPBz/DPI-TX (2:1 mol ratio) (total 25%-w/w) mixture (a') and pristine DPI (b)..... | 4           |
| <b>Figure S7:</b> TGA traces of dual cured MPBz @350 nm/180 °C (a) and only photocured MPBz @350 nm.....                                                         | 5           |

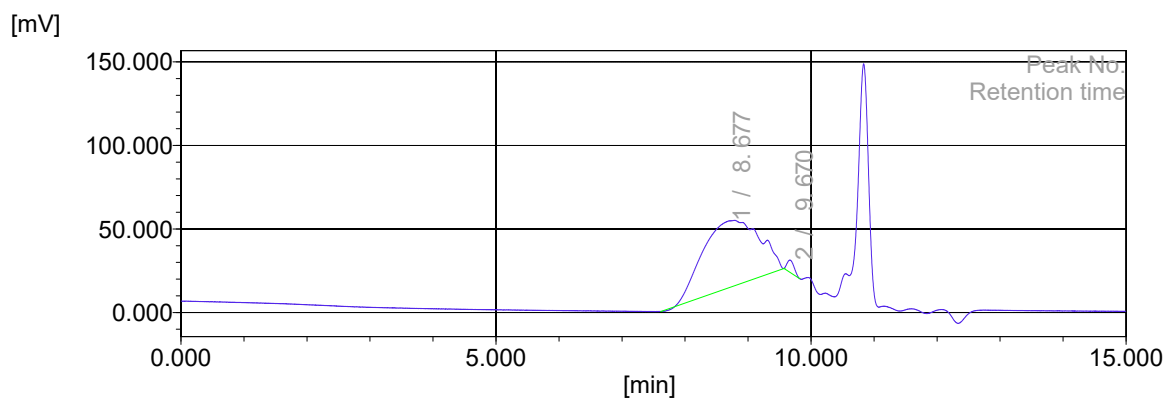

**Figure S1:** GPC trace of MPBz. Tetrahydrofuran was used as an eluent at a flow rate of 1.0 mL/min.

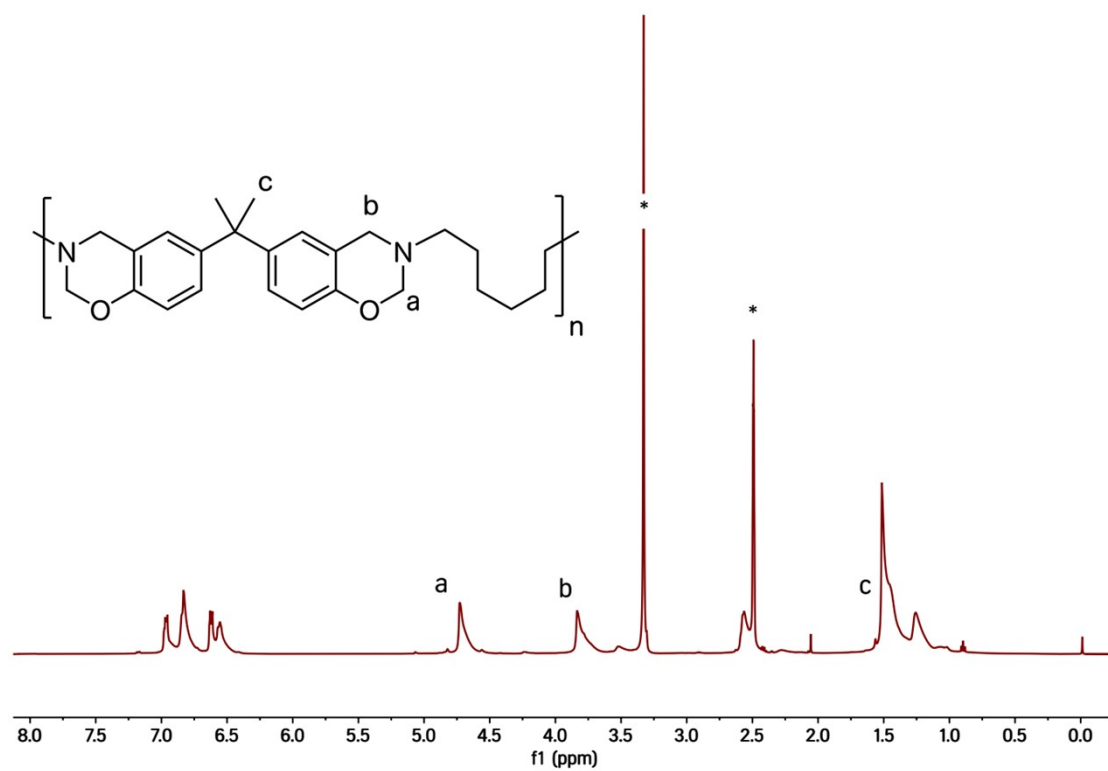

**Figure S2:** <sup>1</sup>H NMR spectrum of MPBz. \*DMSO and water residue in DMSO-d<sub>6</sub>

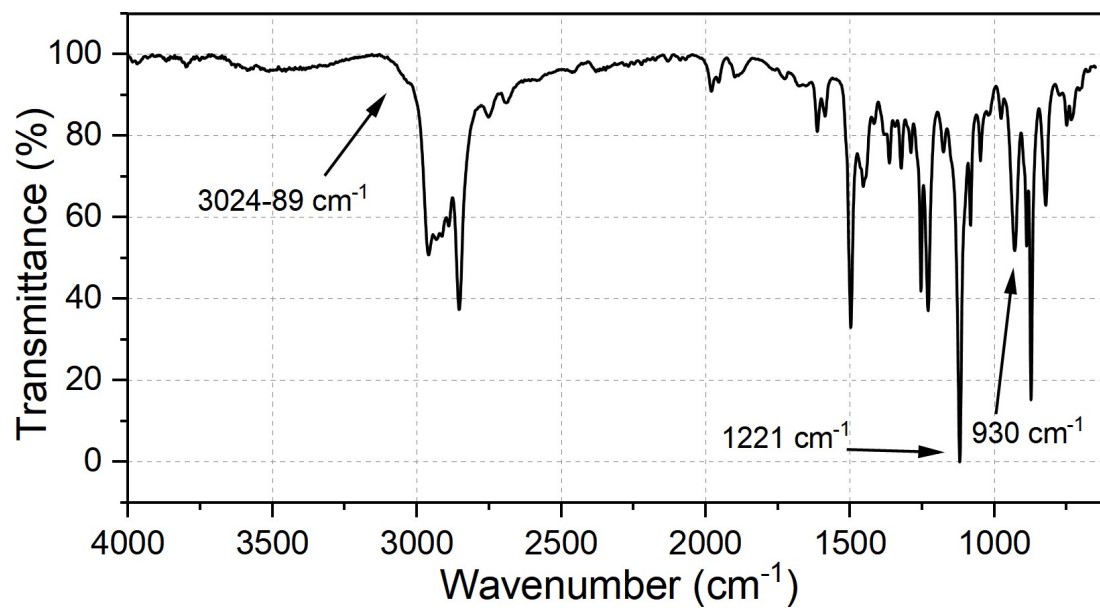

**Figure S3:** FTIR spectrum of MPBz

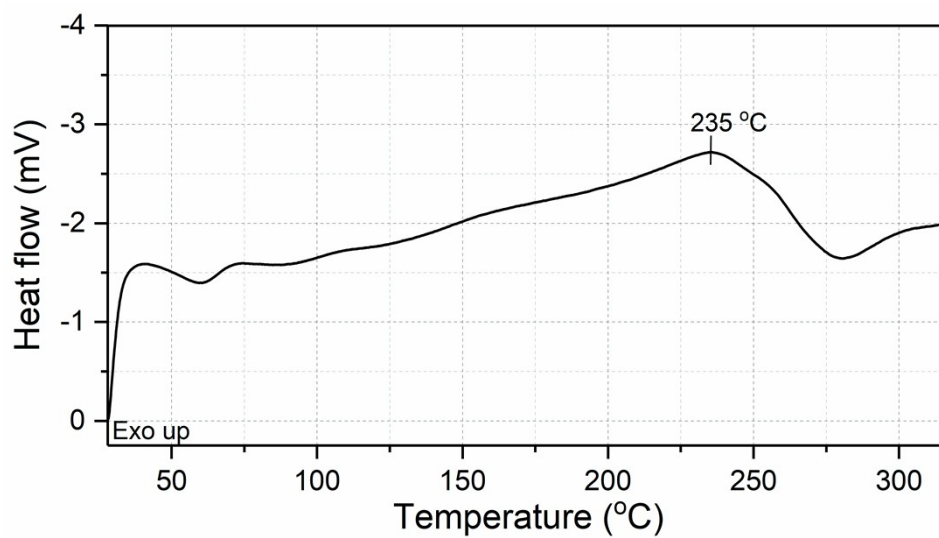

**Figure S4:** DSC thermogram of MPBz

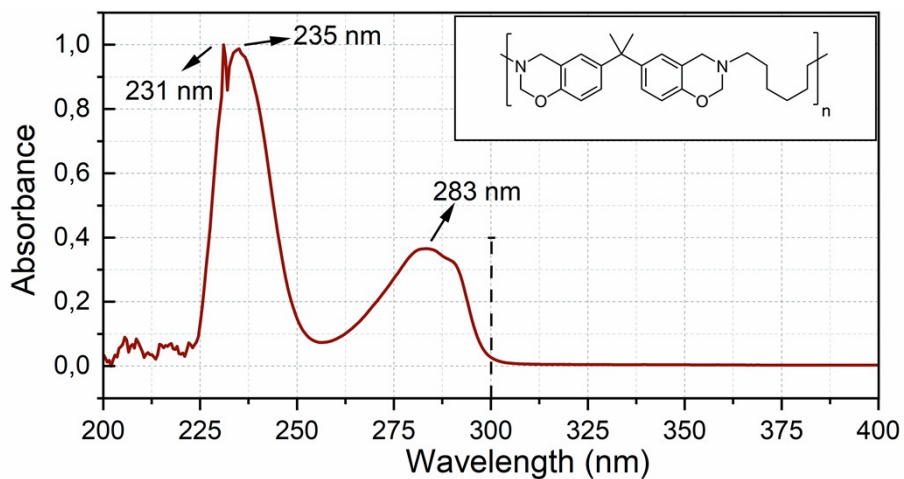

**Figure S5:** UV-Vis spectrum of MPBz in  $\text{CH}_2\text{Cl}_2$

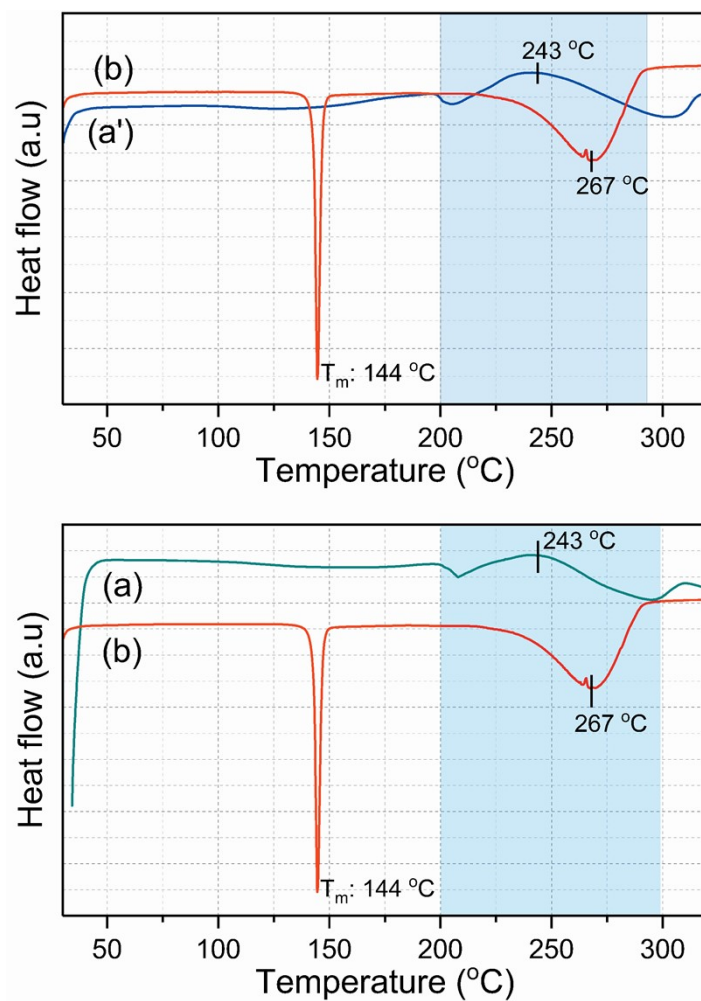

**Figure S6:** DSC thermograms of MPBz/DPI<sub>25%-w/w</sub> mixture (a), MPBz/DPI-TX (2:1 mol ratio) (total 25%-w/w) mixture (a') and pristine DPI (b). \*Mixtures were photocured initially, then preheated to 180 °C and cooled to 30 °C prior to DSC analyses. (Endotherm down)

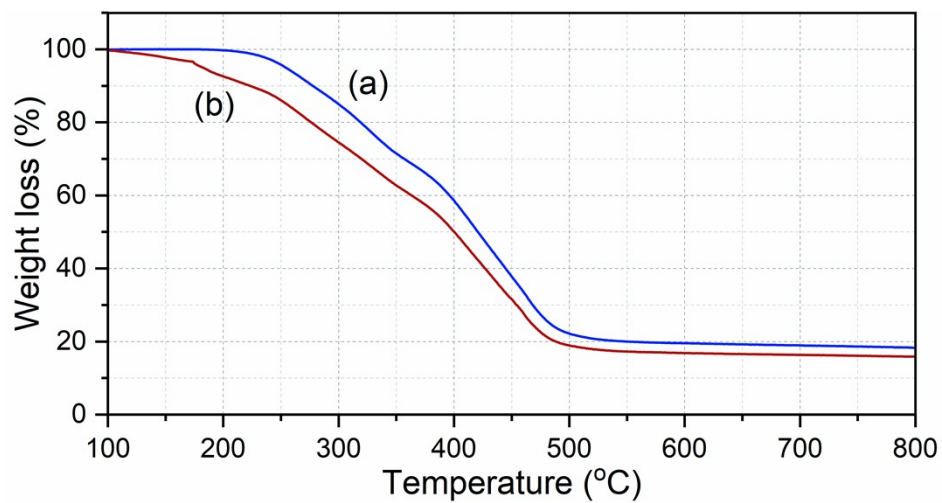

**Figure S7:** TGA traces of dual cured MPBz @350 nm/180 °C (a) and only photocured MPBz @350 nm
